# Supplementary material for: Two-dimensional Be2P4 as a promising thermoelectric material and anode for Na/K-ion batteries
Source: Royal Society of Chemistry journal article supplement (doi:10.1039/d4nr01132e), 2024-01-01
Supplement: d4nr01132e1.pdf [file d4nr01132e1.pdf]

## **Supporting Information**

# **Two-dimensional Be<sub>2</sub>P<sub>4</sub> as promising thermoelectric material and anode for Na/K-ion batteries**

Nidhi Verma, Poonam Chauhan and Ashok Kumar\*

*Department of Physics, Central University of Punjab, Bathinda, India-151401*

(July 3, 2024)

\*Corresponding Author: [ashokphy@cup.edu.in](mailto:ashokphy@cup.edu.in)

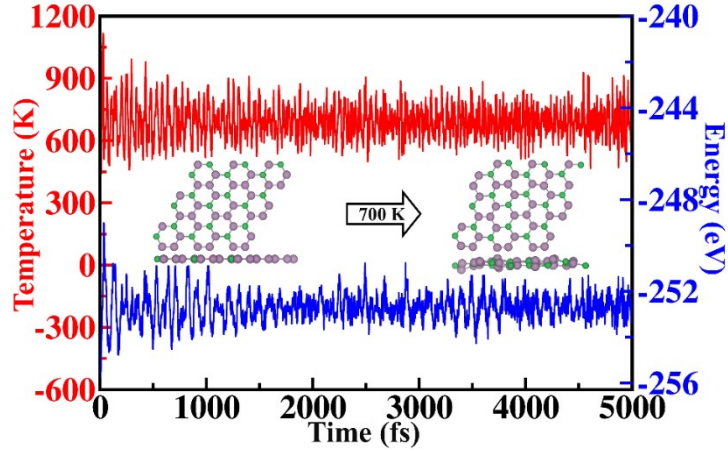

**Figure S1:** MD simulation energy and temperature profiles of  $\text{Be}_2\text{P}_4$  concerning time steps for 700 K temperature. The inset additionally displays the initial and final structures of monolayer following the 5000 fs.

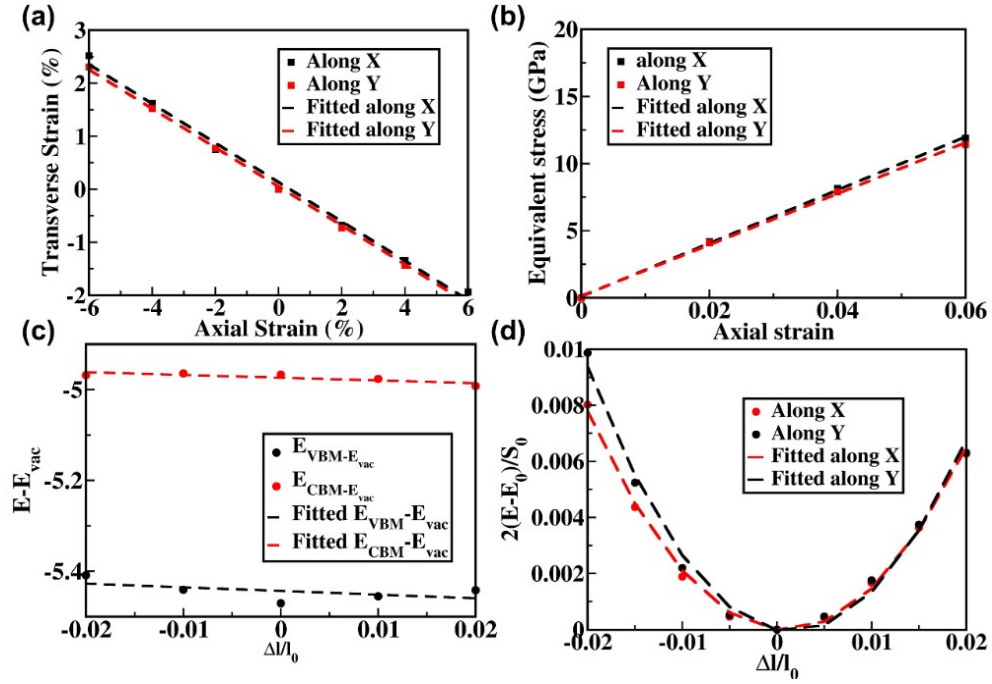

**Figure S2:** (a) Transverse strain (b) Equivalent stress as a function of axial strain along the x- and y-axis. (c) Graph and straight fit graph between  $E - E_{vac}$  and  $\frac{\Delta l}{l_0}$  along x and y axis,  $E - E_{vac}$  is the energy difference of  $i^{\text{th}}$  band and vacuum energy,  $\frac{\Delta l}{l_0}$  is the strain in the respective direction. (d) Graph and parabolic fit between  $\frac{2(E - E_0)}{S_0}$  and  $\frac{\Delta l}{l_0}$ ;  $(2E - E_0)$  is the

difference in the total energy of unstrained and strained structure,  $S_0$  is the surface area of  $\text{Be}_2\text{P}_4$  monolayer and  $\frac{\Delta l}{l_0}$  is the strain in the corresponding direction.

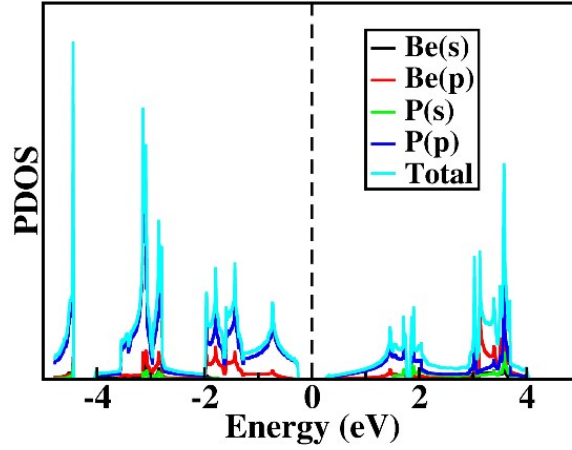

**Figure S3:** The projected density of state (PDOS) using the GGA+PBE level of theory.

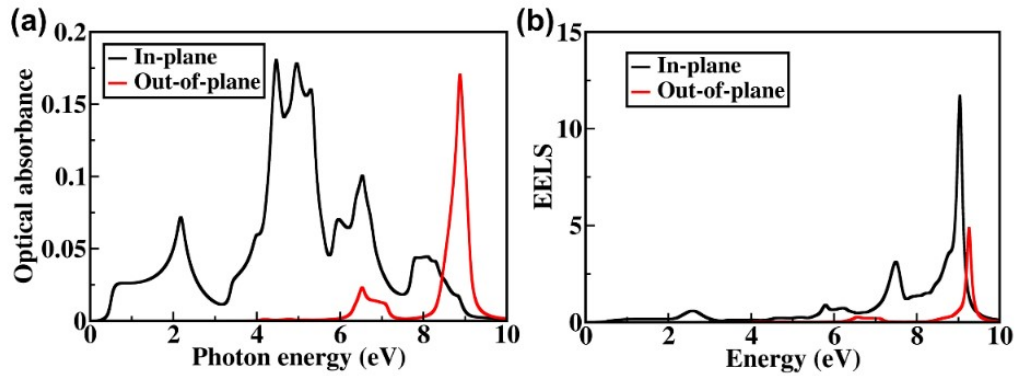

**Figure S4:** (a) Optical absorbance (b) electron energy loss spectrum (EELS) of  $\text{Be}_2\text{P}_4$  monolayer using GGA+PBE method.

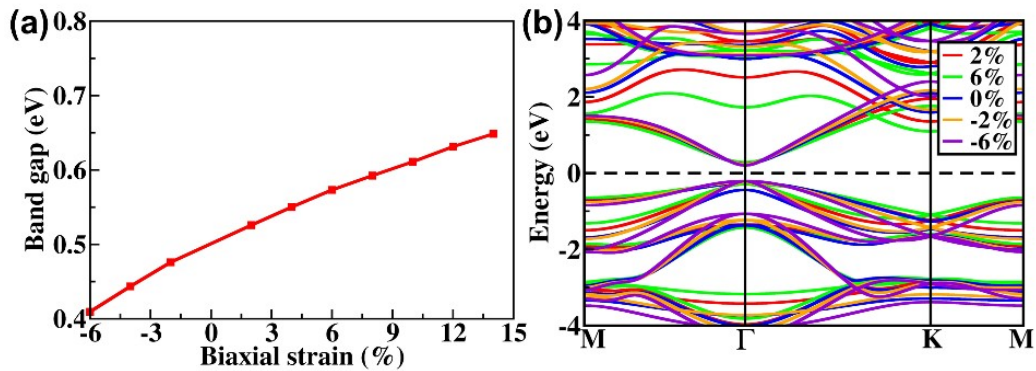

**Figure S5:** (a) Band gap variation (b) electronic band structure of  $\text{Be}_2\text{P}_4$  monolayer corresponding to different biaxial strains using GGA+PBE method.

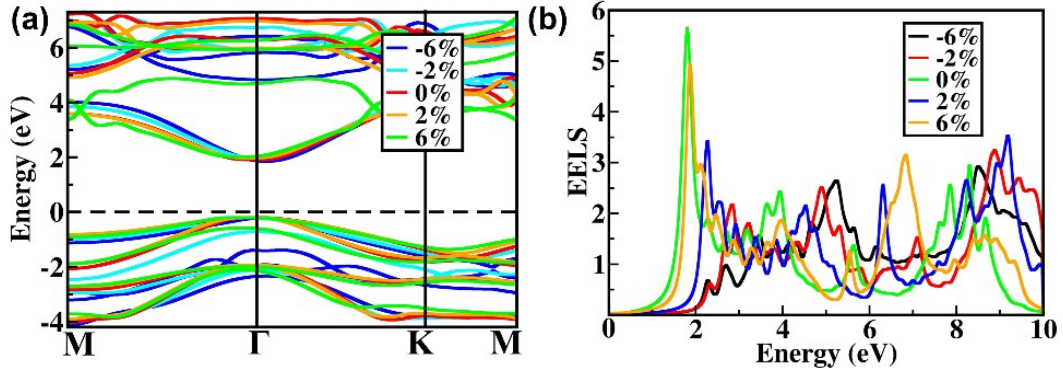

**Figure S6:** (a) Electronic band structure (b) Electron energy loss spectra of  $\text{Be}_2\text{P}_4$  monolayer corresponding to different biaxial strains using GW+BSE method.

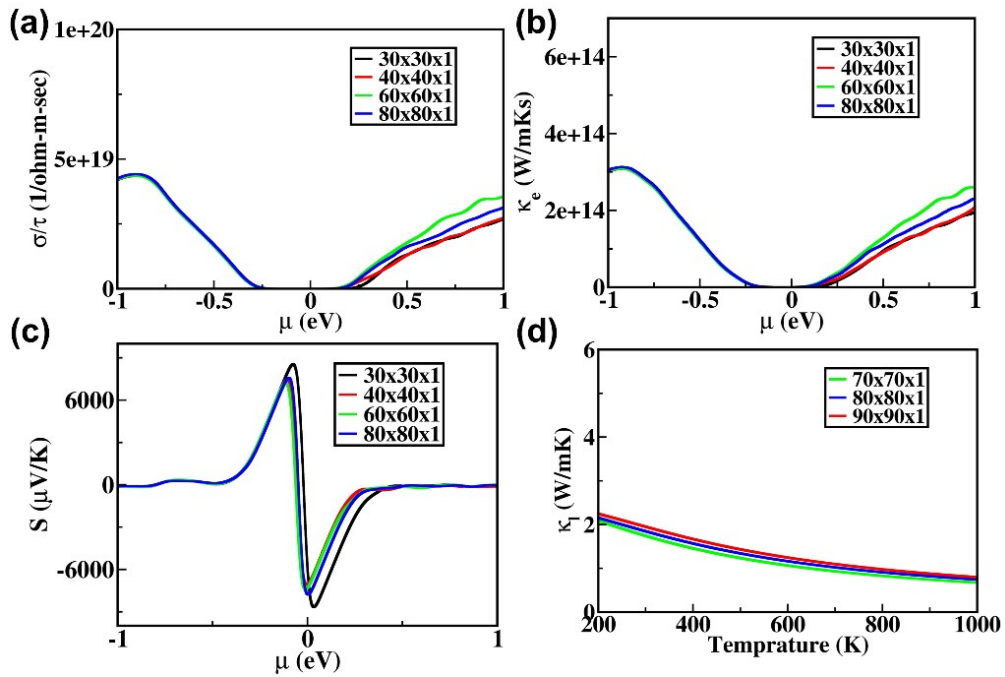

**Figure S7:** Convergence test plot of (a) electrical conductivity, (b) electronic thermal conductivity (c) Seebeck coefficient and (d) Lattice thermal conductivity.

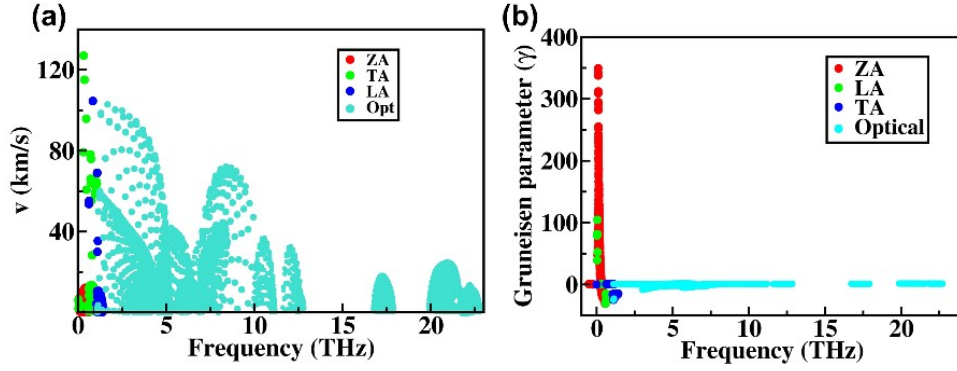

**Figure S8:** (a) group velocity ( $v$ ) and (b) Gruneisen parameter ( $\gamma$ ) plot with respect to frequency of  $\text{Be}_2\text{P}_4$  monolayer.

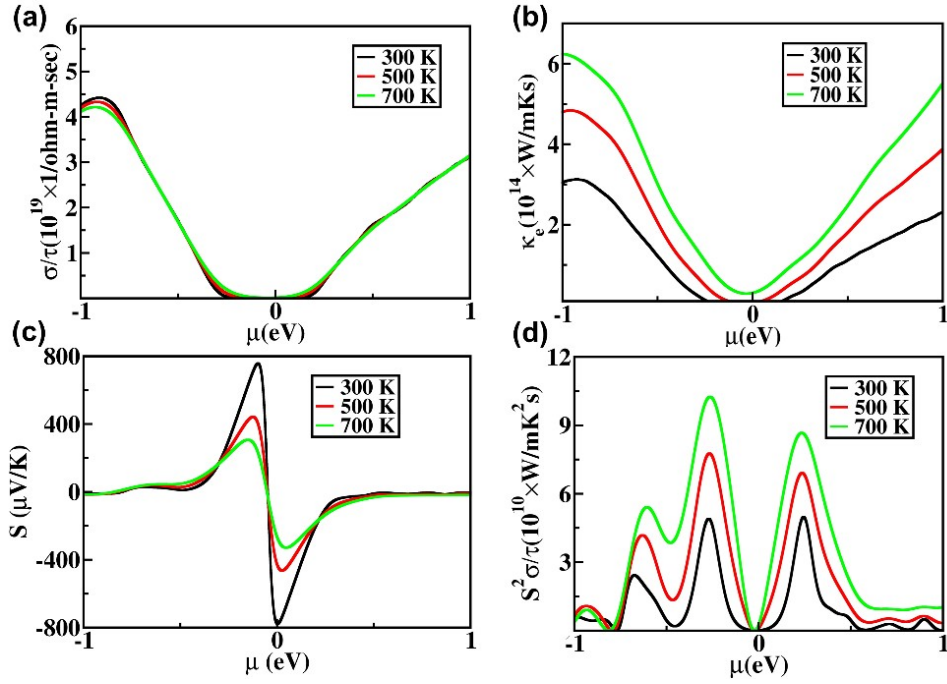

**Figure S9:** (a) Electrical conductivity, (b) electronic thermal conductivity (c) Seebeck coefficient and (d) power factor of  $\text{Be}_2\text{P}_4$  monolayer corresponding to different temperature.

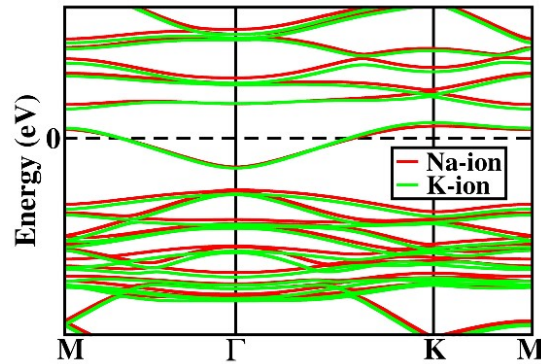

**Figure S10:** Electronic band structure of  $\text{Be}_2\text{P}_4$  monolayer after adsorption of single Na and K-atoms.

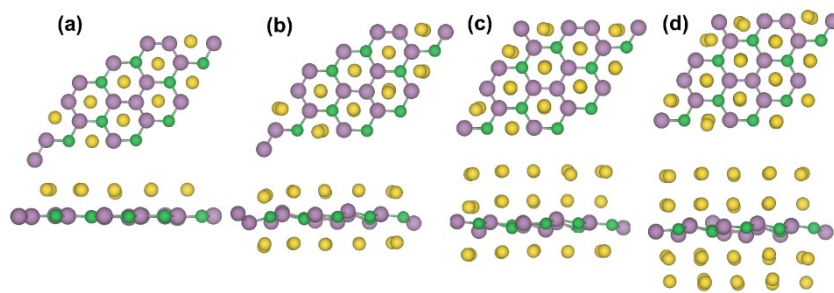

**Figure S11:** Top and side view of  $\text{Be}_2\text{P}_4$  monolayer during the adsorption of Na-atoms layer. The green, vine and yellow colour balls represent Be, P and Na atoms, respectively.

**Table 1:** A comparative analysis of anodic performance of previously studied 2D materials.

| Sr. No. | Anode materials                           | Diffusion barrier (eV) | Open circuit voltage (V) | Specific capacity (mAh/g) | Energy density (Wh/Kg) | References |
|---------|-------------------------------------------|------------------------|--------------------------|---------------------------|------------------------|------------|
| 1.      | $\text{Be}_2\text{P}_4$ (Na/K)            | 0.23/0.18              | 0.8/0.1                  | 3776.93/3021.55           | 8460.32/8883.35        | This work* |
| 2.      | $\text{Be}_2\text{P}_3\text{N}$<br>(Na/K) | 0.06/0.04              | 0.02/0.1                 | 2574/1716                 | 5055/ 3325             | [1]        |
| 3.      | o- $\text{B}_2\text{N}_2$ (Na)            | 0.16                   | 0.33                     | 2159.83                   | -                      | [2]        |
| 4.      | $\Theta$ -graphene                        | 0.39/0.22              | 0.29/0.60                | 1275.12/956.34            | -                      | [3]        |
| 5.      | $\text{BeN}_4$ (K)                        | 0.06                   | 0.179–0.084              | 842                       | -                      | [4]        |
| 6.      | $\text{B}_2\text{P}_2$ (Na/K)             | 0.10/0.07              | 0.26/0.47                | 1282.34/854.89            | -                      | [5]        |
| 7.      | $\text{BC}_3$ (Na/K)                      | -                      | 0.12/0.16                | 572/858                   | -                      | [6]        |
| 8.      | Penta siligraphene<br>(Na/K)              | -                      | -                        | 514.3/1028.7              | -                      | [7]        |

|     |                                    |           |           |                |      |     |
|-----|------------------------------------|-----------|-----------|----------------|------|-----|
| 9.  | Penta-diamond (Na/K)               | 0.25/0.10 | 0.33/0.80 | 2231.49/743.86 | -    | [8] |
| 10. | Be <sub>2</sub> C <sub>5</sub> (K) | 0.074     | 0.28      | 2060           | 5455 | [9] |

## References:

1. Sun, S. and X. Ye, *Monolayer Be<sub>2</sub>P<sub>3</sub>N as a high capacity and high energy density anode material for ultrafast charging Na-and K-ion batteries*. Applied Surface Science, 2020. **527**: p. 146783.
2. Khossossi, N., et al., *Revealing the superlative electrochemical properties of o-B<sub>2</sub>N<sub>2</sub> monolayer in Lithium/Sodium-ion batteries*. Nano Energy, 2022. **96**: p. 107066.
3. Wang, S., et al., *Reconfiguring graphene for high-performance metal-ion battery anodes*. Energy Storage Materials, 2019. **16**: p. 619-624.
4. Cheng, Z., et al., *BeN<sub>4</sub> monolayer as an excellent Dirac anode material for potassium-ion batteries*. Journal of Alloys and Compounds, 2023. **936**: p. 168351.
5. Lin, H., et al., *Flexible borophosphene monolayer: A potential Dirac anode for high-performance non-lithium ion batteries*. Applied Surface Science, 2021. **544**: p. 148895.
6. Joshi, R.P., et al., *Hexagonal BC<sub>3</sub>: A robust electrode material for Li, Na, and K ion batteries*. The Journal of Physical Chemistry Letters, 2015. **6**(14): p. 2728-2732.
7. Wang, H., et al., *Two-dimensional penta-siligraphene with high performance for non-lithium metal ions batteries anode materials*. Solid State Ionics, 2022. **385**: p. 116020.
8. Younis, U., et al., *Two-dimensional metallic pentadiamond as anode material for Li-/Na-/K-ion batteries with high performance*. Materials Today Energy, 2021. **20**: p. 100664.
9. Wang, F., et al., *Be<sub>2</sub>C<sub>5</sub> Monolayer with Quasiplanar Pentacoordinate Carbon Atoms and Ultrahigh Energy Density as a Dirac Anode for Potassium-Ion Batteries*. PRX Energy, 2023. **2**(3): p. 033012.
